# Supplementary material for: Silver(i) complex of a new imino-N-heterocyclic carbene and ligand transfer to palladium(ii) and rhodium(i)
Source: Royal Society of Chemistry journal article supplement (doi:10.1039/b304474b), 2003-01-01
Supplement: b304474b.doc [file b304474b.doc]

**Supporting Information**

**Silver (I) Complex of a New Imino-N-Heterocyclic Carbene and Ligand Transfer to Palladium (II) and Rhodium (I)**

Karl S. Coleman*, Hamish T. Chamberlayne, Simon Turberville, Malcolm L. H. Green and Andrew R. Cowley.

*Inorganic Chemistry Laboratory, University of Oxford, South Parks Road, Oxford, UK OX13QR. Email: karl.coleman@chem.ox.ac.uk*


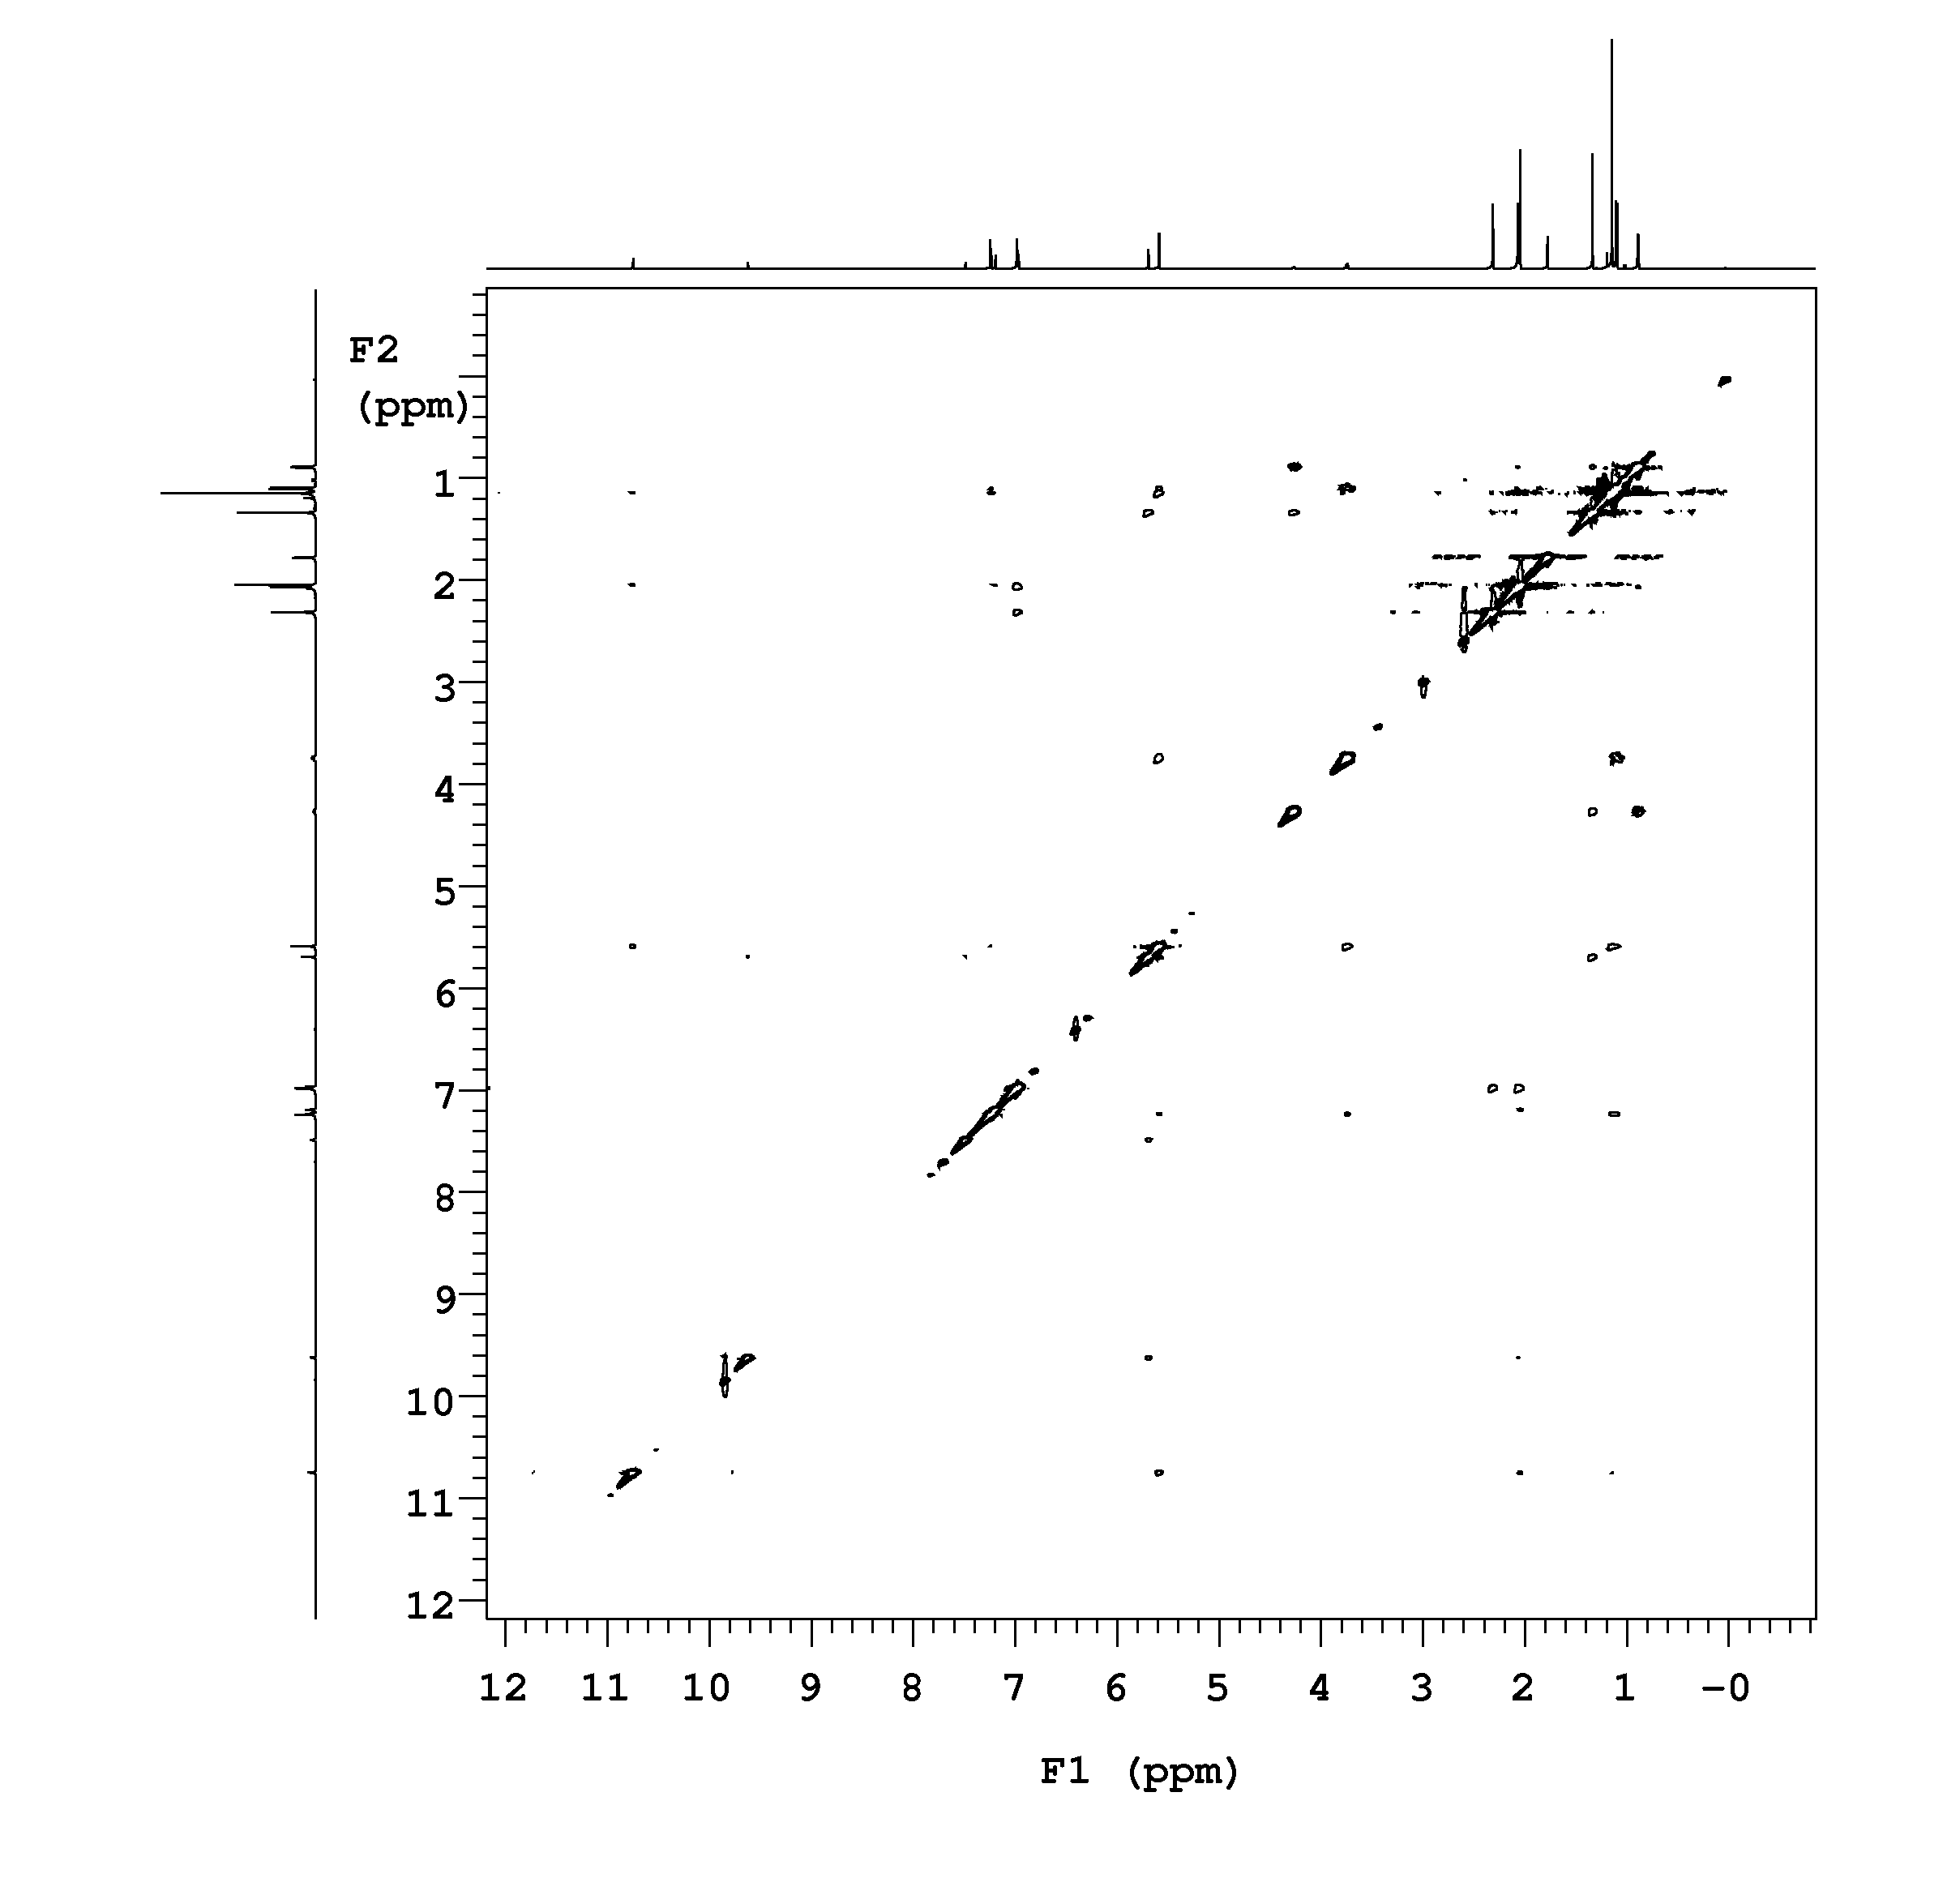


Supplementary Figure 1, 1H - NOESY spectrum of imidazolium ligand (**1**).


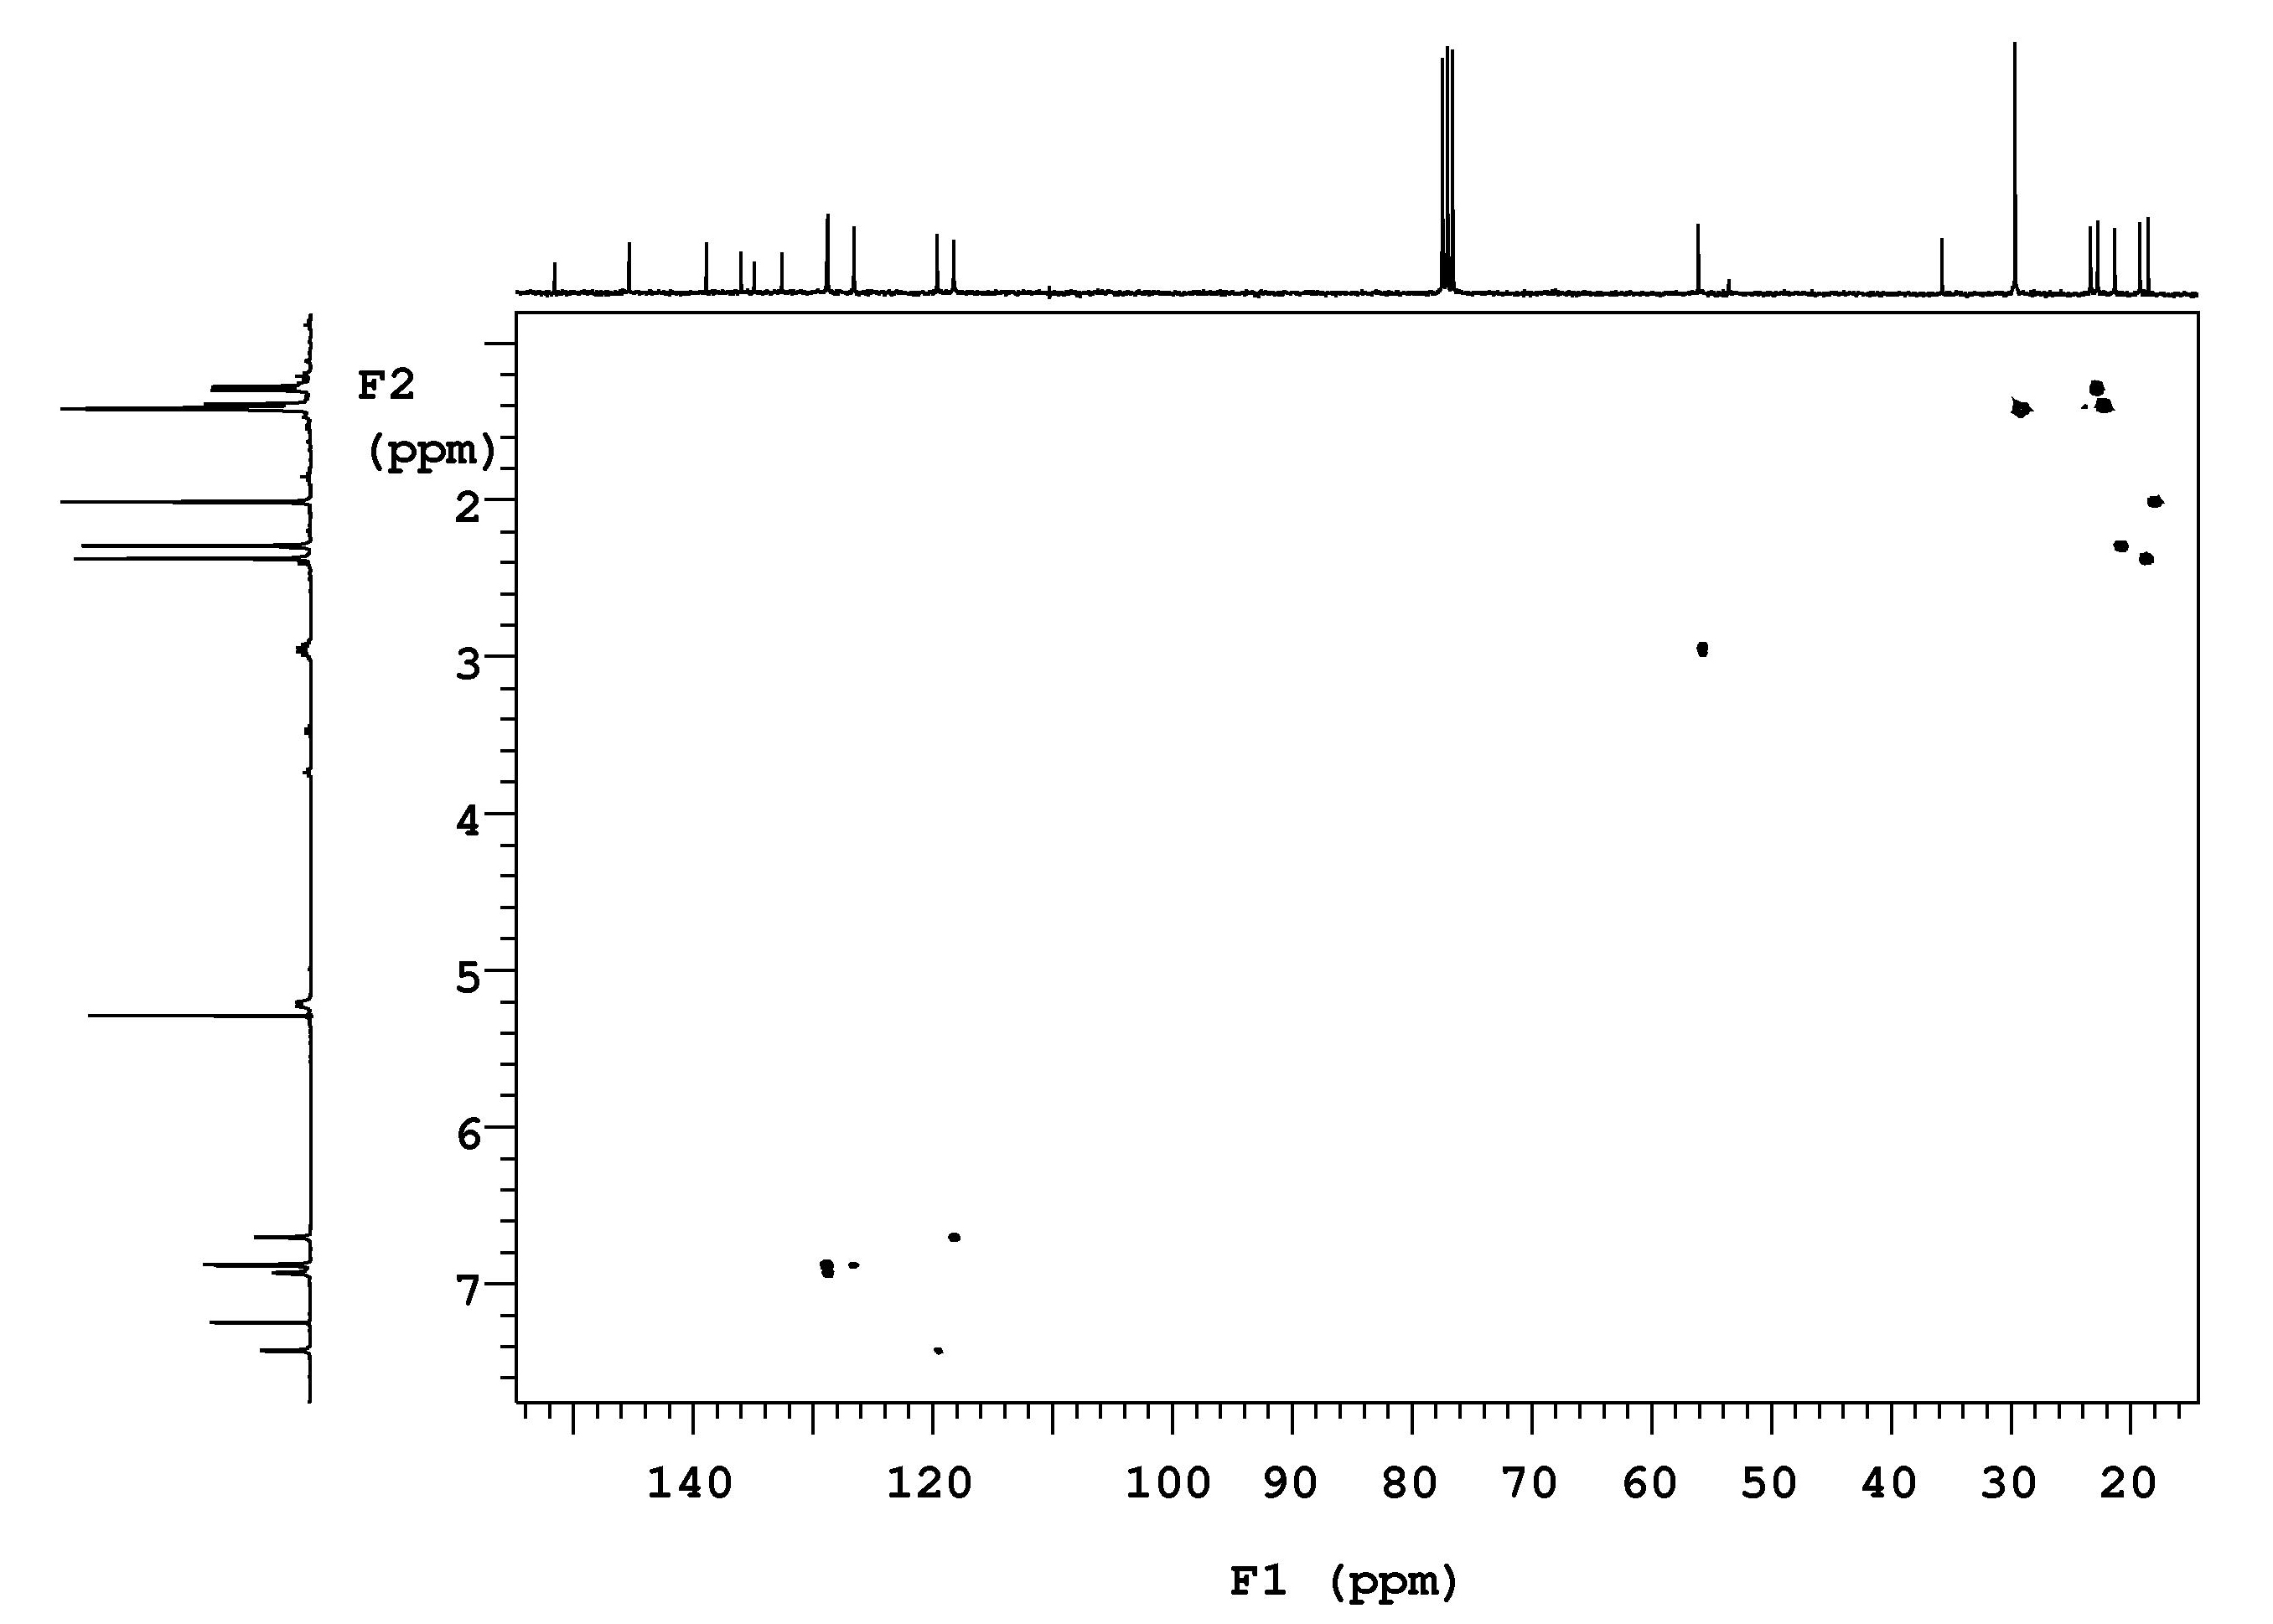


Supplementary Figure 2: 1H / 13C gHSQC spectrum of palladium complex (**3**).


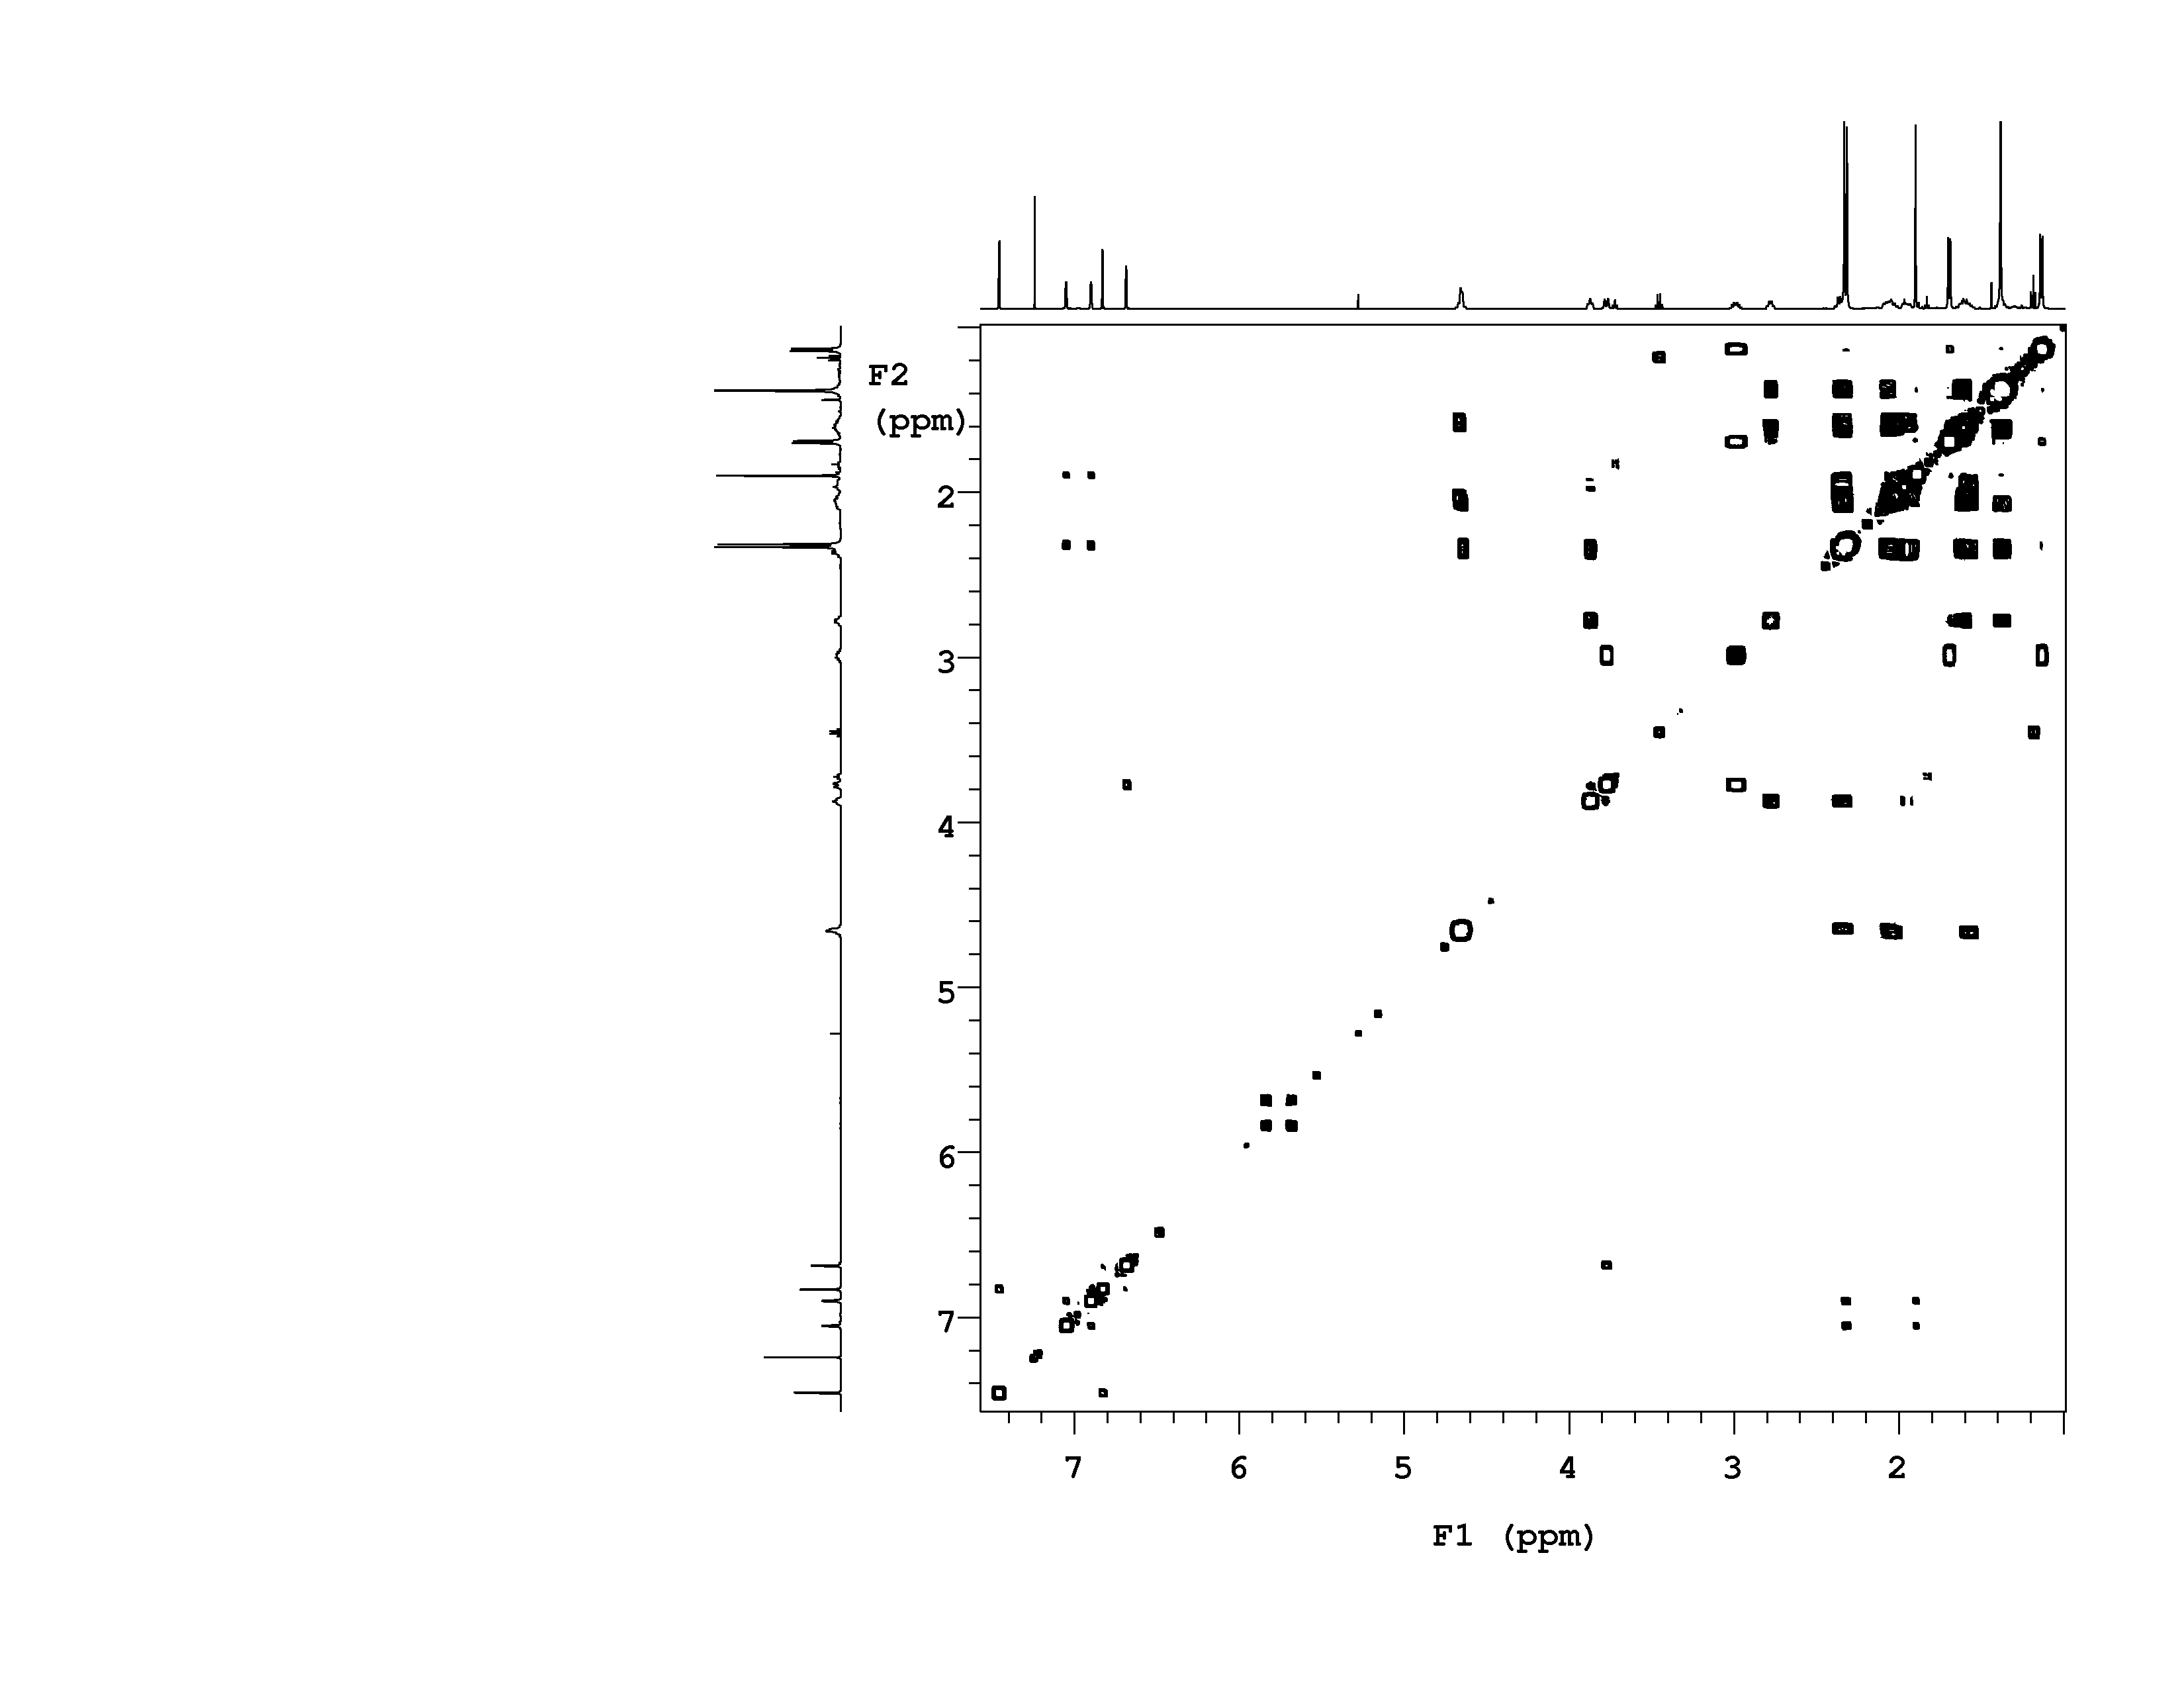


Supplementary Figure 3: 1H - 1H gCOSY spectrum of rhodium complex (**4**).
